# Supplementary material
Source: PubMed Central journal article supplement (PMC3531959)
Supplement: NIHMS415569-supplement-Supporting_Information.pdf [file NIHMS415569-supplement-Supporting_Information.pdf]

## Supporting Information

© Copyright Wiley-VCH Verlag GmbH & Co. KGaA, 69451 Weinheim, 2012

### **Structural Characterization and Computer-Aided Optimization of a Small-Molecule Inhibitor of the Arp2/3 Complex, a Key Regulator of the Actin Cytoskeleton**

Andrew W. Baggett,<sup>[a]</sup> Zoe Cournia,<sup>[b]</sup> Min Suk Han,<sup>[a]</sup> George Patargias,<sup>[b]</sup> Adam C. Glass,<sup>[a]</sup> Shih-Yuan Liu,<sup>[a]</sup> and Brad J. Nolen<sup>\*[a]</sup>

cmdc\_201200104\_sm\_miscellaneous\_information.pdf

**Supplementary Table 1: X-ray crystallography data collection and refinement statistics**

| <b>Data Collection</b>             |                                               |
|------------------------------------|-----------------------------------------------|
| Beamline                           | BL 5.0.1                                      |
| Resolution (Å)                     | 20.0-2.48                                     |
| Space group                        | P2 <sub>1</sub> 2 <sub>1</sub> 2 <sub>1</sub> |
| Cell constants                     | a = 111.19<br>b = 129.69<br>c = 205.00        |
| Mosaicity (°)                      | 0.45                                          |
| Measured reflections               | 1027196                                       |
| Ubique reflections                 | 93,952                                        |
| Mean I/σ                           | 19.6/3.1                                      |
| R <sub>sym</sub> (%) <sup>a</sup>  | 6.3/37.8                                      |
| Completeness (%)                   | 88.7/74.7                                     |
| <b>Refinement</b>                  |                                               |
| Modeled residues                   | 1923                                          |
| Water molecules                    | 221                                           |
| Average B-factor (Å <sup>2</sup> ) |                                               |
| main chain                         | 44.4                                          |
| side chain                         | 45.4                                          |
| inhibitor                          | 42.6                                          |
| water                              | 35.0                                          |
| RMS from ideal                     |                                               |
| bond lengths                       | 0.008                                         |
| bond angles                        | 1.4                                           |
| Ramachandran plot                  |                                               |
| most favored                       | 1334                                          |
| additionally allowed               | 163                                           |
| generously allowed                 | 11                                            |
| disallowed                         | 0                                             |
| R <sub>free</sub>                  | 26.1                                          |
| R <sub>work</sub> <sup>b</sup>     | 22.1                                          |

<sup>a</sup>R<sub>sym</sub> =  $\sum |I_h - \langle I_h \rangle| / \sum I_h$ , where  $\langle I_h \rangle$  is the average intensity over symmetrically equivalent reflections.

<sup>b</sup>R<sub>work</sub> =  $\sum ||F_o| - |F_c|| / \sum F_o$ , where F<sub>o</sub> is an observed amplitude and F<sub>c</sub> a calculated amplitude; R<sub>free</sub> is the same statistic calculated over a subset (5%) of the data that have not been used for refinement.

**Supplementary Table 2:** Predicted Properties from *QikProp* for **1** and its analogs.

| Compound  | MW <sup>a</sup> | QP log <i>P</i> <sup>b</sup> | QP log <i>S</i> <sup>c</sup> | QP PCaco <sup>d</sup> |
|-----------|-----------------|------------------------------|------------------------------|-----------------------|
| <b>1</b>  | 296.343         | 3.835                        | -4.646                       | 1,564.440             |
| <b>2</b>  | 312.343         | 3.166                        | -3.721                       | 772.960               |
| <b>3</b>  | 330.789         | 4.771                        | -6.036                       | 2,095.861             |
| <b>4</b>  | 326.370         | 4.062                        | -4.399                       | 2,550.883             |
| <b>5</b>  | 312.343         | 3.488                        | -4.879                       | 654.939               |
| <b>6</b>  | 330.789         | 4.431                        | -5.002                       | 2,457.463             |
| <b>7</b>  | 312.798         | 4.217                        | -4.602                       | 2,331.180             |
| <b>8</b>  | 330.789         | 4.289                        | -4.701                       | 2,460.804             |
| <b>9</b>  | 326.370         | 3.915                        | -4.087                       | 2,471.665             |
| <b>10</b> | 312.798         | 4.165                        | -4.533                       | 2,632.276             |
| <b>11</b> | 312.798         | 4.058                        | -4.221                       | 2,346.557             |

<sup>a</sup> Molecular weight. <sup>b</sup> Predicted octanol/water log *P*. <sup>c</sup> Predicted aqueous solubility; *S* in mol/L. <sup>d</sup> Predicted Caco-2 cell permeability in nm/s.

**Supplementary Table 3:** Forward and reverse mutations for compounds **3, 6, 7, 8, 10, 11**. Hysteresis is found to be between 0.04 and 0.5 kcal/mol for all cases.

| Compound            | $\Delta G$ bound (kcal/mol) | $\Delta G$ unbound (kcal/mol) | $\Delta\Delta G$ total (kcal/mol) |
|---------------------|-----------------------------|-------------------------------|-----------------------------------|
| <b>3</b>            | -3.35 ± 0.12                | 0.25 ± 0.09                   | 3.6 ± 0.28                        |
| <b>3 – reverse</b>  | 3.56 ± 0.15                 | 0.26 ± 0.09                   | -3.8 ± 0.24                       |
| <b>6</b>            | 2.44 ± 0.09                 | 2.56 ± 0.08                   | 0.12 ± 0.12                       |
| <b>6 – reverse</b>  | -2.12 ± 0.11                | -2.4 ± 0.09                   | -0.28 ± 0.14                      |
| <b>7</b>            | 10.0 ± 0.13                 | 8.54 ± 0.1                    | -1.46 ± 0.16                      |
| <b>7 – reverse</b>  | 9.84 ± 0.13                 | 8.32 ± 0.1                    | 1.52 ± 0.16                       |
| <b>8</b>            | -0.87 ± 0.11                | 1.05 ± 0.08                   | 1.92 ± 0.14                       |
| <b>8 – reverse</b>  | 0.84 ± 0.11                 | -1.17 ± 0.09                  | -2.01 ± 0.14                      |
| <b>10</b>           | -5.0 ± 0.12                 | -1.1 ± 0.09                   | 3.9 ± 0.15                        |
| <b>10 – reverse</b> | -4.58 ± 0.11                | 1.1 ± 0.09                    | -3.47 ± 0.14                      |
| <b>11</b>           | 7.4 ± 0.12                  | 9.9 ± 0.11                    | 2.5 ± 0.16                        |
| <b>11 – reverse</b> | -7.5 ± 0.13                 | -10.5 ± 0.11                  | 3.0 ± 0.17                        |

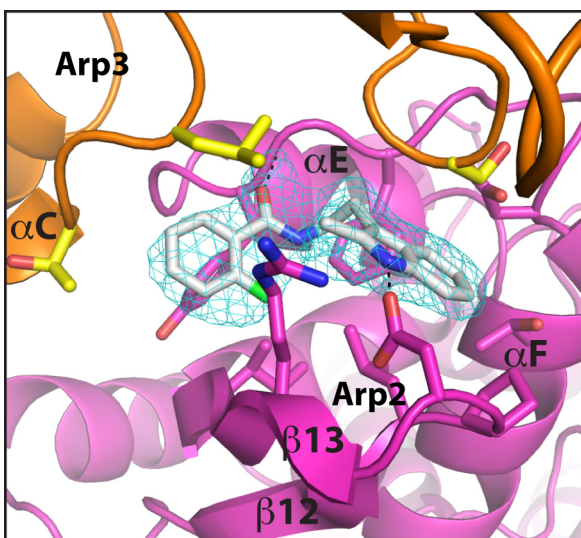

**Supplementary Figure 1:** CK-666 binding pocket showing an electron density map contoured at  $2.0 \sigma$  for CK-666. The map was calculated from the final refined structure with phase contributions from CK-666 omitted.

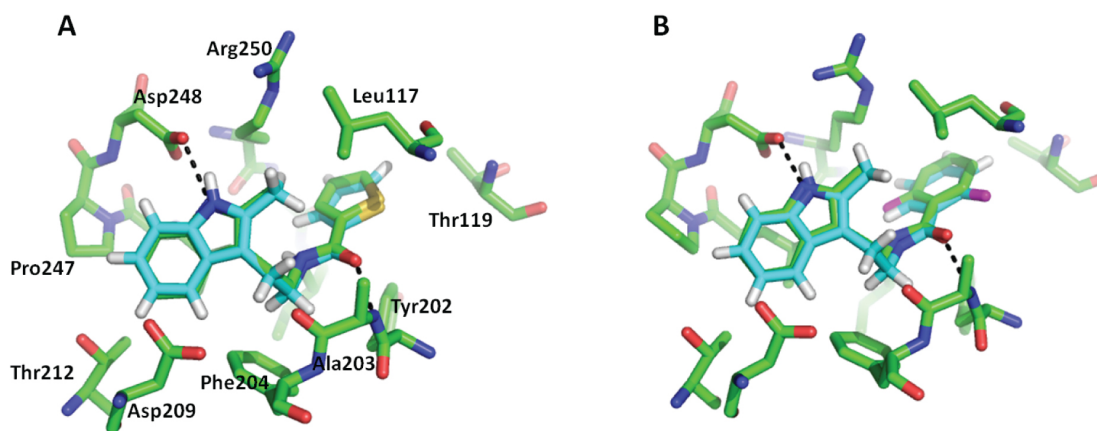

**Supplementary Figure 2:** Comparison of the docked (cyan) and the observed crystal structure (green) for the complex of Arp2/3 with inhibitor (A) **12** and (B) **1**. The RMSD for heavy atoms is  $0.31 \text{ \AA}$  for **12** and  $0.42 \text{ \AA}$  for **1**. The fluorine atom is displayed in magenta. Residues Gly187 and Ser188 have been omitted for clarity.

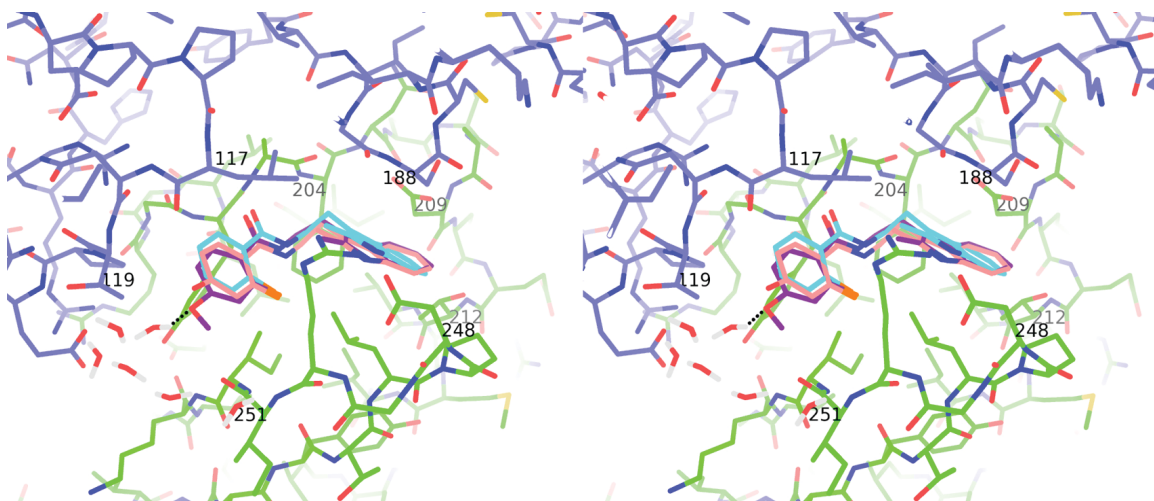

**Supplementary Figure 3:** Binding pocket with bound **1**, **2** and **4** showing the effect of hydroxyl and methoxy substituents at the R<sub>4</sub> position. Compound **1** (cyan) and the FEP poses of **2** (pink) and **4** (purple) shown in the binding pocket of Arp3 (blue) and Arp2 (green) from the crystal structure of Arp2/3 with bound **1** (3UKR.pdb, light blue).

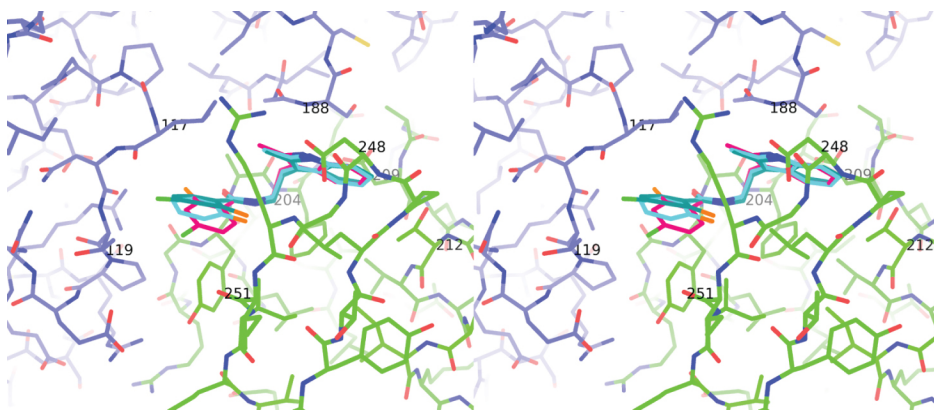

**Supplementary Figure 4:** Binding pocket with bound **1** and **6** showing the effect of a chlorine substituent at the R<sub>4</sub> position. Compound **1** (cyan) and the FEP pose (dark blue) and Glide docked pose of **6** (magenta) are shown bound to Arp3 (blue) and Arp2 (green) from the crystal structure of Arp2/3 with bound **1** (3UKR.pdb).

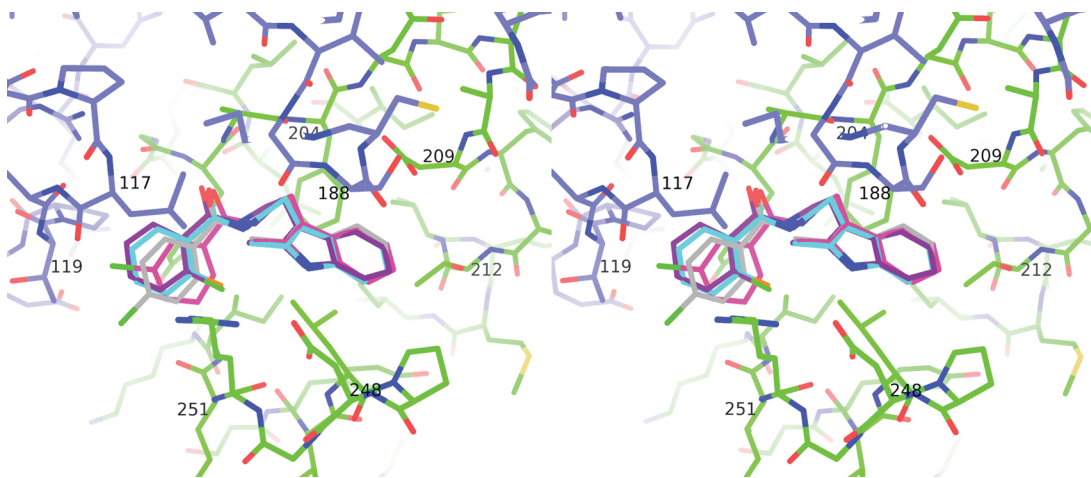

**Supplementary Figure 5:** Binding pocket with bound **1**, **7**, **10** and **11** showing the effect of a mono-chloro substitutions on the benzene ring. Compound **1** (cyan) and the FEP poses of **7** (grey), **10** (purple) and **11** (magenta) are shown bound to Arp3 (blue) and Arp2 (green) from the crystal structure of Arp2/3 with bound **1** (3UKR.pdb).

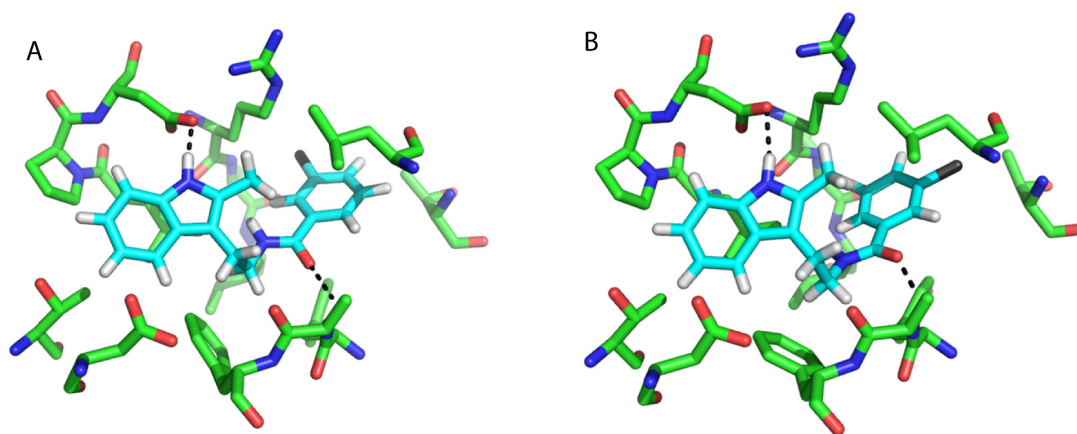

**Supplementary Figure 6:** The two equivalent positions of the chlorine substitution for compound **11**. In (A), the chloro substituent (colored in dark green) points toward Arg250 and is mutated to hydrogen with a  $\Delta\Delta G=2.52$  kcal/mol, while in (B) the chloro substituent points to Thr119 and is mutated to hydrogen with a  $\Delta\Delta G=2.58$  kcal/mol.
